# Supplementary material for: A Hetero-Photoautotrophic Two-Stage Cultivation Process for Production of Fucoxanthin by the Marine Diatom Nitzschia laevis
Source: MDPI journal article supplement (doi:10.3390/md16070219), 2018-06-25
Supplement: s1 [file s1]

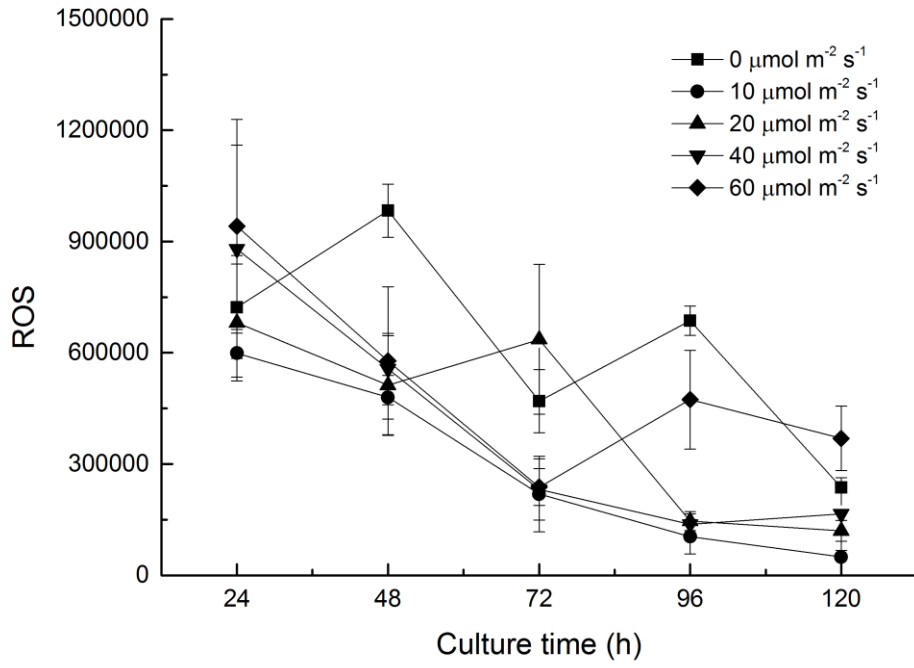

**Fig. S1** Effect of light intensity on ROS level of *N. laevis*. Values are mean  $\pm$  SD of at least three independent experiments.

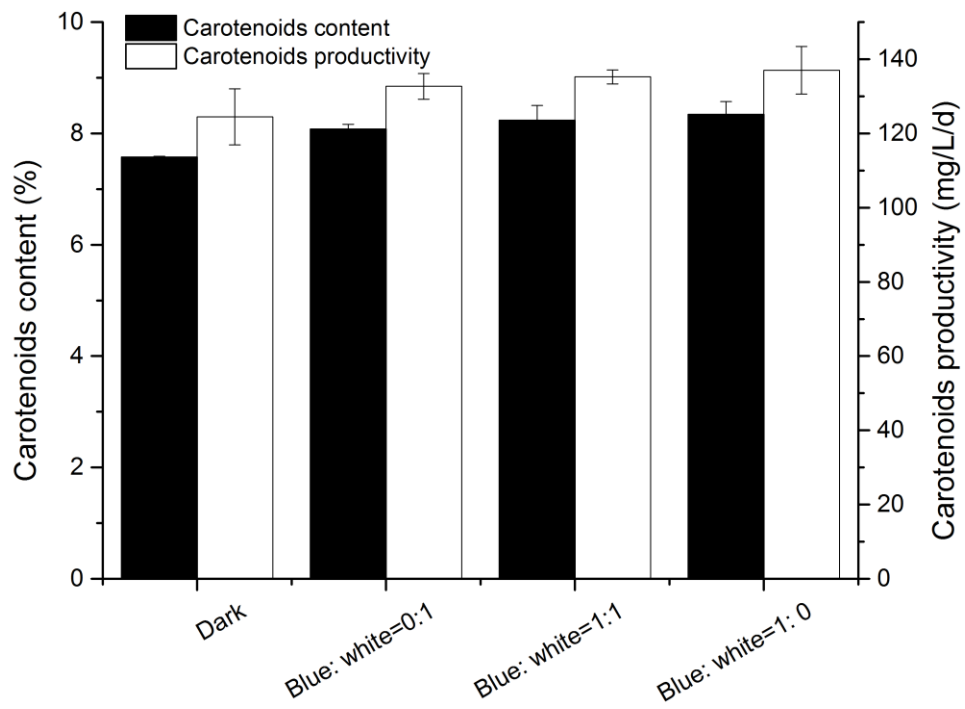

**Fig. S2** Effect of light quality on carotenoids content of *N. laevis*. Values are mean  $\pm$  SD of at least three independent experiments.
